# Supplementary material for: The prognostic value of stress hyperglycemia ratio (SHR) in cardiac metabolic syndrome: dual-cohort evidence and machine learning modeling
Source: Research Square preprint supplement (doi:10.21203/rs.3.rs-7542509/v1), 2025-10-06
Supplement: Supplementary file 1 [file a28a7d134094ef30edd71b5c.docx]

**Supplemental Material**

**Table S1** Baseline characteristics of CHARLS participants (classified by SHR tertiles).

| **Characteristic** | **N** | **Overall**  N = 4,2791 | **Q1**  N = 1,5011 | **Q2**  N = 1,3281 | **Q3**  N = 1,4501 | ***p*-value**2 |
| --- | --- | --- | --- | --- | --- | --- |
| Age | 4,279 | 59.53 ± 9.20 | 59.76 ± 8.98 | 59.21 ± 9.35 | 59.60 ± 9.29 | 0.11 |
| Gender, n (%) | 4,279 |  |  |  |  | <0.001 |
| Male |  | 1,497 (35) | 480 (32) | 438 (33) | 579 (40) |  |
| Female |  | 2,782 (65) | 1,021 (68) | 890 (67) | 871 (60) |  |
| Education level, n (%) | 4,279 |  |  |  |  | 0.5 |
| Below high school |  | 3,804 (89) | 1,346 (90) | 1,174 (88) | 1,284 (89) |  |
| High school and above |  | 475 (11) | 155 (10) | 154 (12) | 166 (11) |  |
| Marital status, n (%) | 4,279 |  |  |  |  | 0.7 |
| Married or living with partner |  | 3,707 (87) | 1,292 (86) | 1,156 (87) | 1,259 (87) |  |
| Widowed/divorced/separated/never married |  | 572 (13) | 209 (14) | 172 (13) | 191 (13) |  |
| Smoking status, n (%) | 4,279 |  |  |  |  | 0.008 |
| Never smoker |  | 2,979 (70) | 1,068 (71) | 938 (71) | 973 (67) |  |
| Former smoker |  | 918 (21) | 315 (21) | 255 (19) | 348 (24) |  |
| Current smoker |  | 382 (8.9) | 118 (7.9) | 135 (10) | 129 (8.9) |  |
| Drinking status, n (%) | 4,279 |  |  |  |  | <0.001 |
| Never |  | 2,892 (68) | 1,040 (69) | 919 (69) | 933 (64) |  |
| Former |  | 365 (8.5) | 141 (9.4) | 122 (9.2) | 102 (7.0) |  |
| Current |  | 1,022 (24) | 320 (21) | 287 (22) | 415 (29) |  |
| BMI (kg/m2) | 4,279 | 25.71 ± 3.69 | 25.95 ± 3.77 | 25.78 ± 3.67 | 25.39 ± 3.61 | <0.001 |
| Waist Circumference (cm) | 4,279 | 90.98 ± 10.86 | 92.12 ± 9.76 | 90.99 ± 10.90 | 89.80 ± 11.76 | <0.001 |
| SBP | 4,279 | 137.90 ± 20.44 | 138.58 ± 20.88 | 137.26 ± 20.29 | 137.77 ± 20.10 | 0.4 |
| DBP | 4,279 | 79.65 ± 11.55 | 80.15 ± 11.57 | 79.62 ± 11.83 | 79.17 ± 11.23 | 0.065 |
| Triglyceride (mg/dL) | 4,279 | 196.07 ± 146.73 | 169.93 ± 86.91 | 178.88 ± 97.36 | 238.88 ± 210.36 | <0.001 |
| TC (mg/dL) | 4,279 | 200.23 ± 41.75 | 201.03 ± 38.99 | 199.31 ± 39.09 | 200.26 ± 46.61 | 0.2 |
| HDL-C (mg/dL) | 4,279 | 42.15 ± 12.06 | 42.93 ± 10.91 | 43.01 ± 12.30 | 40.55 ± 12.79 | <0.001 |
| LDL-C (mg/dL) | 4,279 | 117.51 ± 39.12 | 123.62 ± 35.51 | 119.57 ± 38.17 | 109.31 ± 42.07 | <0.001 |
| Glucose, plasma (mg/dL) | 4,279 | 123.31 ± 47.37 | 105.83 ± 22.05 | 116.64 ± 30.65 | 147.51 ± 65.70 | <0.001 |
| HbA1c (%) | 4,279 | 5.46 ± 1.01 | 5.69 ± 0.88 | 5.39 ± 0.98 | 5.29 ± 1.13 | <0.001 |
| BUN (mg/dL) | 4,279 | 15.50 ± 4.49 | 15.34 ± 4.46 | 15.22 ± 4.46 | 15.93 ± 4.52 | <0.001 |
| UA (mg/dL) | 4,279 | 4.63 ± 1.31 | 4.60 ± 1.26 | 4.57 ± 1.31 | 4.71 ± 1.36 | 0.028 |
| Creatinine (mg/dL) | 4,279 | 0.78 ± 0.26 | 0.77 ± 0.20 | 0.78 ± 0.20 | 0.80 ± 0.36 | 0.044 |
| Hemoglobin (g/dL) | 4,279 | 14.49 ± 2.19 | 14.66 ± 2.29 | 14.52 ± 2.13 | 14.28 ± 2.13 | <0.001 |
| WBC (×109/L) | 4,279 | 6.45 ± 1.87 | 6.56 ± 1.86 | 6.41 ± 1.83 | 6.38 ± 1.91 | 0.006 |
| SHR | 4,279 | 1.13 ± 0.28 | 0.92 ± 0.09 | 1.08 ± 0.04 | 1.39 ± 0.32 | <0.001 |

1For categorical variables, all values are expressed as numbers (n) and proportion (%), for continuous variables, all values are expressed as mean ± standard deviation; 2 Categorical variables were analysed using the Rao-Scott Chi-Square Test; continuous variables were analysed using the Kruskal-Wallis test.

BMI: Body Mass Index; SBP: Systolic blood pressure; DBP: Diastolic blood pressure; TC: Total cholesterol; HDL-C: high density lipoprotein cholesterol; LDL-C: low density lipoprotein cholesterol; HbA1c: Hemoglobin A1c; BUN: Blood urea nitrogen; UA: Uric acid; WBC: White blood cell; SHR: stress hyperglycemia ratio

**Table S2** Multivariate Cox regression model to assess the association between SHR and mortality risk (CHARLS).

| Correlation with mortality risk | **Quantiles of the SHR** | | | |
| --- | --- | --- | --- | --- |
| **Q1** | **Q2** | **Q3** | ***P* for trend** |
| **All-cause mortality** | | | | |
| Number of deaths | 162 | 150 | 210 |  |
| Model 1 HR (95% CI)  *P*-value | Reference | 1.05 (0.84, 1.31)  0.681 | 1.37 (1.12, 1.69)  0.002 | 0.002 |
| Model 2 HR (95% CI)  *P*-value | Reference | 1.06 (0.85, 1.33)  0.592 | 1.36 (1.11, 1.67)  0.003 | 0.003 |
| Model 3 HR (95% CI)  *P*-value | Reference | 1.05 (0.84, 1.31)  0.679 | 1.33 (1.08, 1.65)  0.008 | 0.011 |

Model 1: no covariates were adjusted; Model 2: adjusted for age, gender; Model 3: adjusted for age, gender, education level, marital status, smoking status, drinking status, BMI, TC, LDL-C, BUN, UA, creatinine, hemoglobin and WBC.

SHR: stress-induced hyperglycemia; CVD: cardiovascular diseases; HR: hazard ratio; 95% CI: 95% confidence interval

**Table S3** Assess multicollinearity among predictor variables using variance inflation factor (VIF) analysis.

| Feature | VIF |
| --- | --- |
| Age | 1.695 |
| Gender | 1.784 |
| Race | 1.051 |
| BMI | 1.164 |
| SBP | 1.311 |
| DBP | 1.334 |
| TC | 1.139 |
| HDL-C | 1.285 |
| BUN | 1.856 |
| UA | 1.317 |
| Creatinine | 1.563 |
| Hemoglobin | 1.601 |
| SHR | 1.036 |

BMI: Body Mass Index; SBP: Systolic blood pressure; DBP: Diastolic blood pressure; TC: Total cholesterol; HDL-C: high density lipoprotein cholesterol BUN: Blood urea nitrogen; UA: Uric acid; SHR: stress hyperglycemia ratio

**Figure_S1**


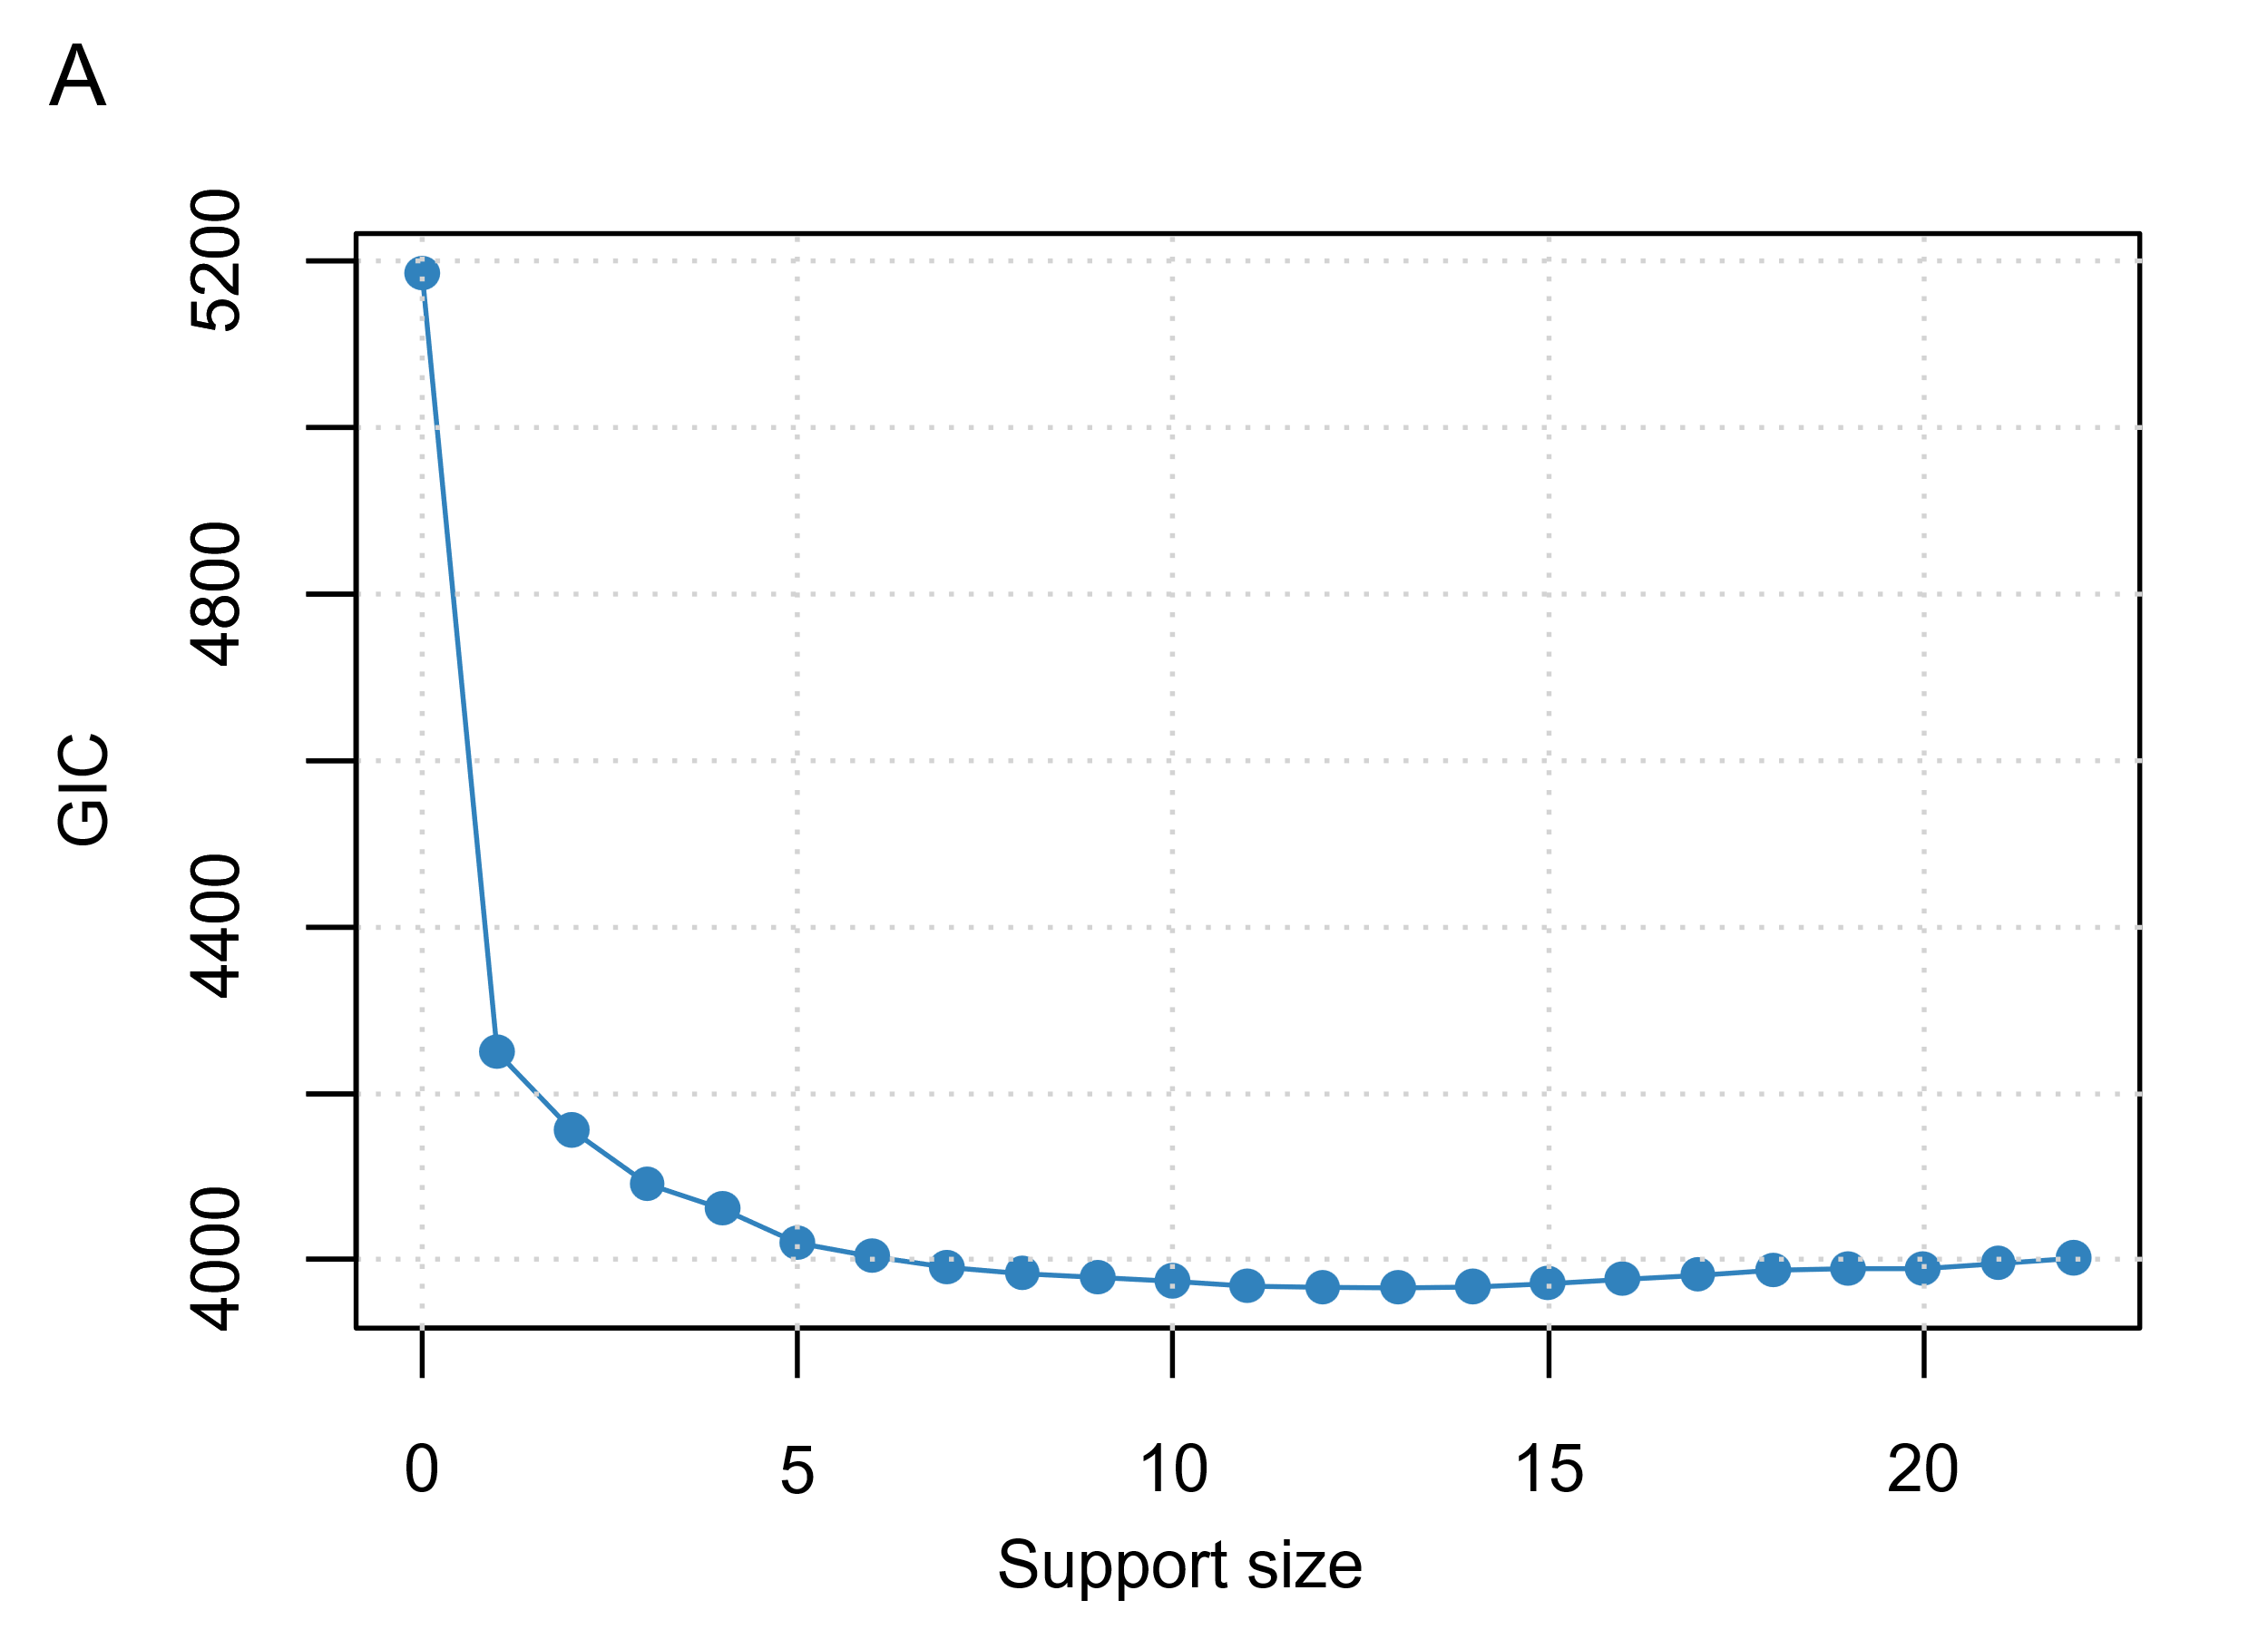


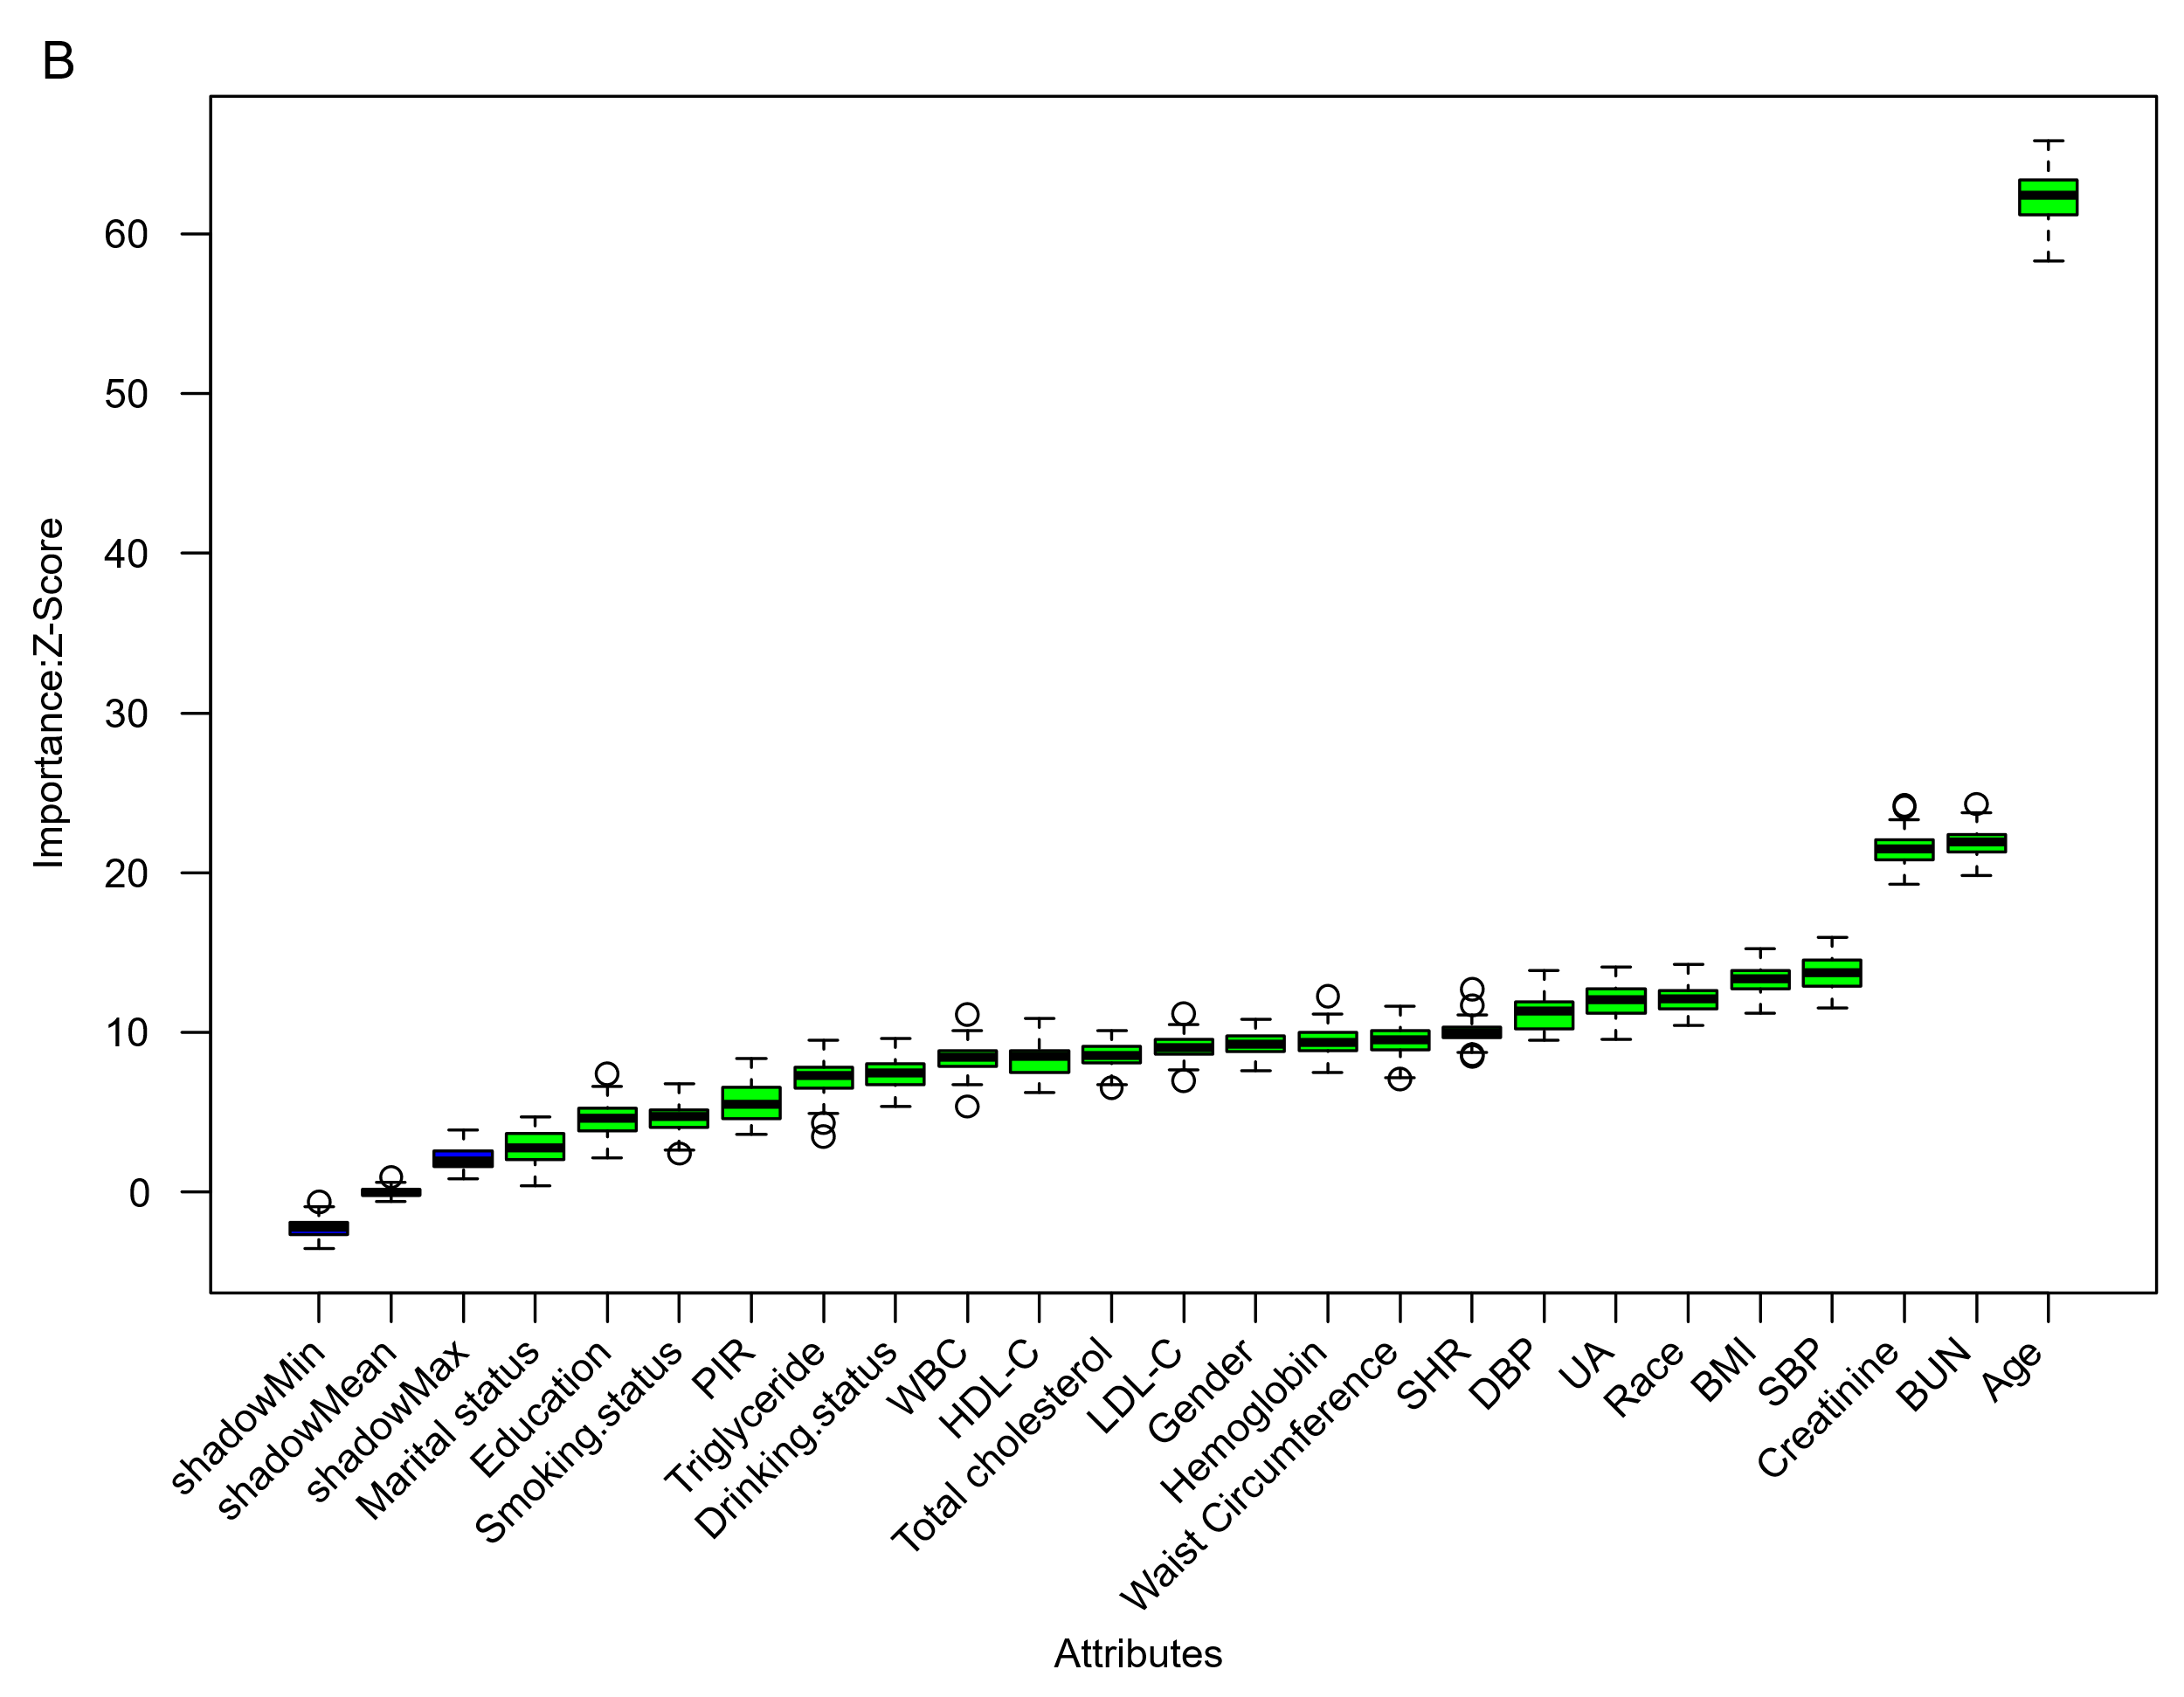


The ABESS algorithm (A) and Boruta algorithm (B) were employed during the variable selection phase. (A) Changes in the Generalised Information Criterion (GIC) when selecting features using the ABESS algorithm. (B) The Boruta algorithm is used to assess the significance of potential risk factors for mortality. The x-axis displays the variable names, and the y-axis represents the Z-values for each variable. Box plots illustrate the Z-values calculated during the modelling process, with green boxes indicating important variables and red boxes indicating unimportant variables.

PIR: Ratio of family income to poverty; WBC: White blood cell; HDL-C: high density lipoprotein cholesterol; LDL-C: low density lipoprotein cholesterol; SHR: stress hyperglycemia ratio; BMI: Body Mass Index; SBP: Systolic blood pressure; DBP: Diastolic blood pressure; BUN: Blood urea nitrogen; UA: Uric acid

**Figure_S2**


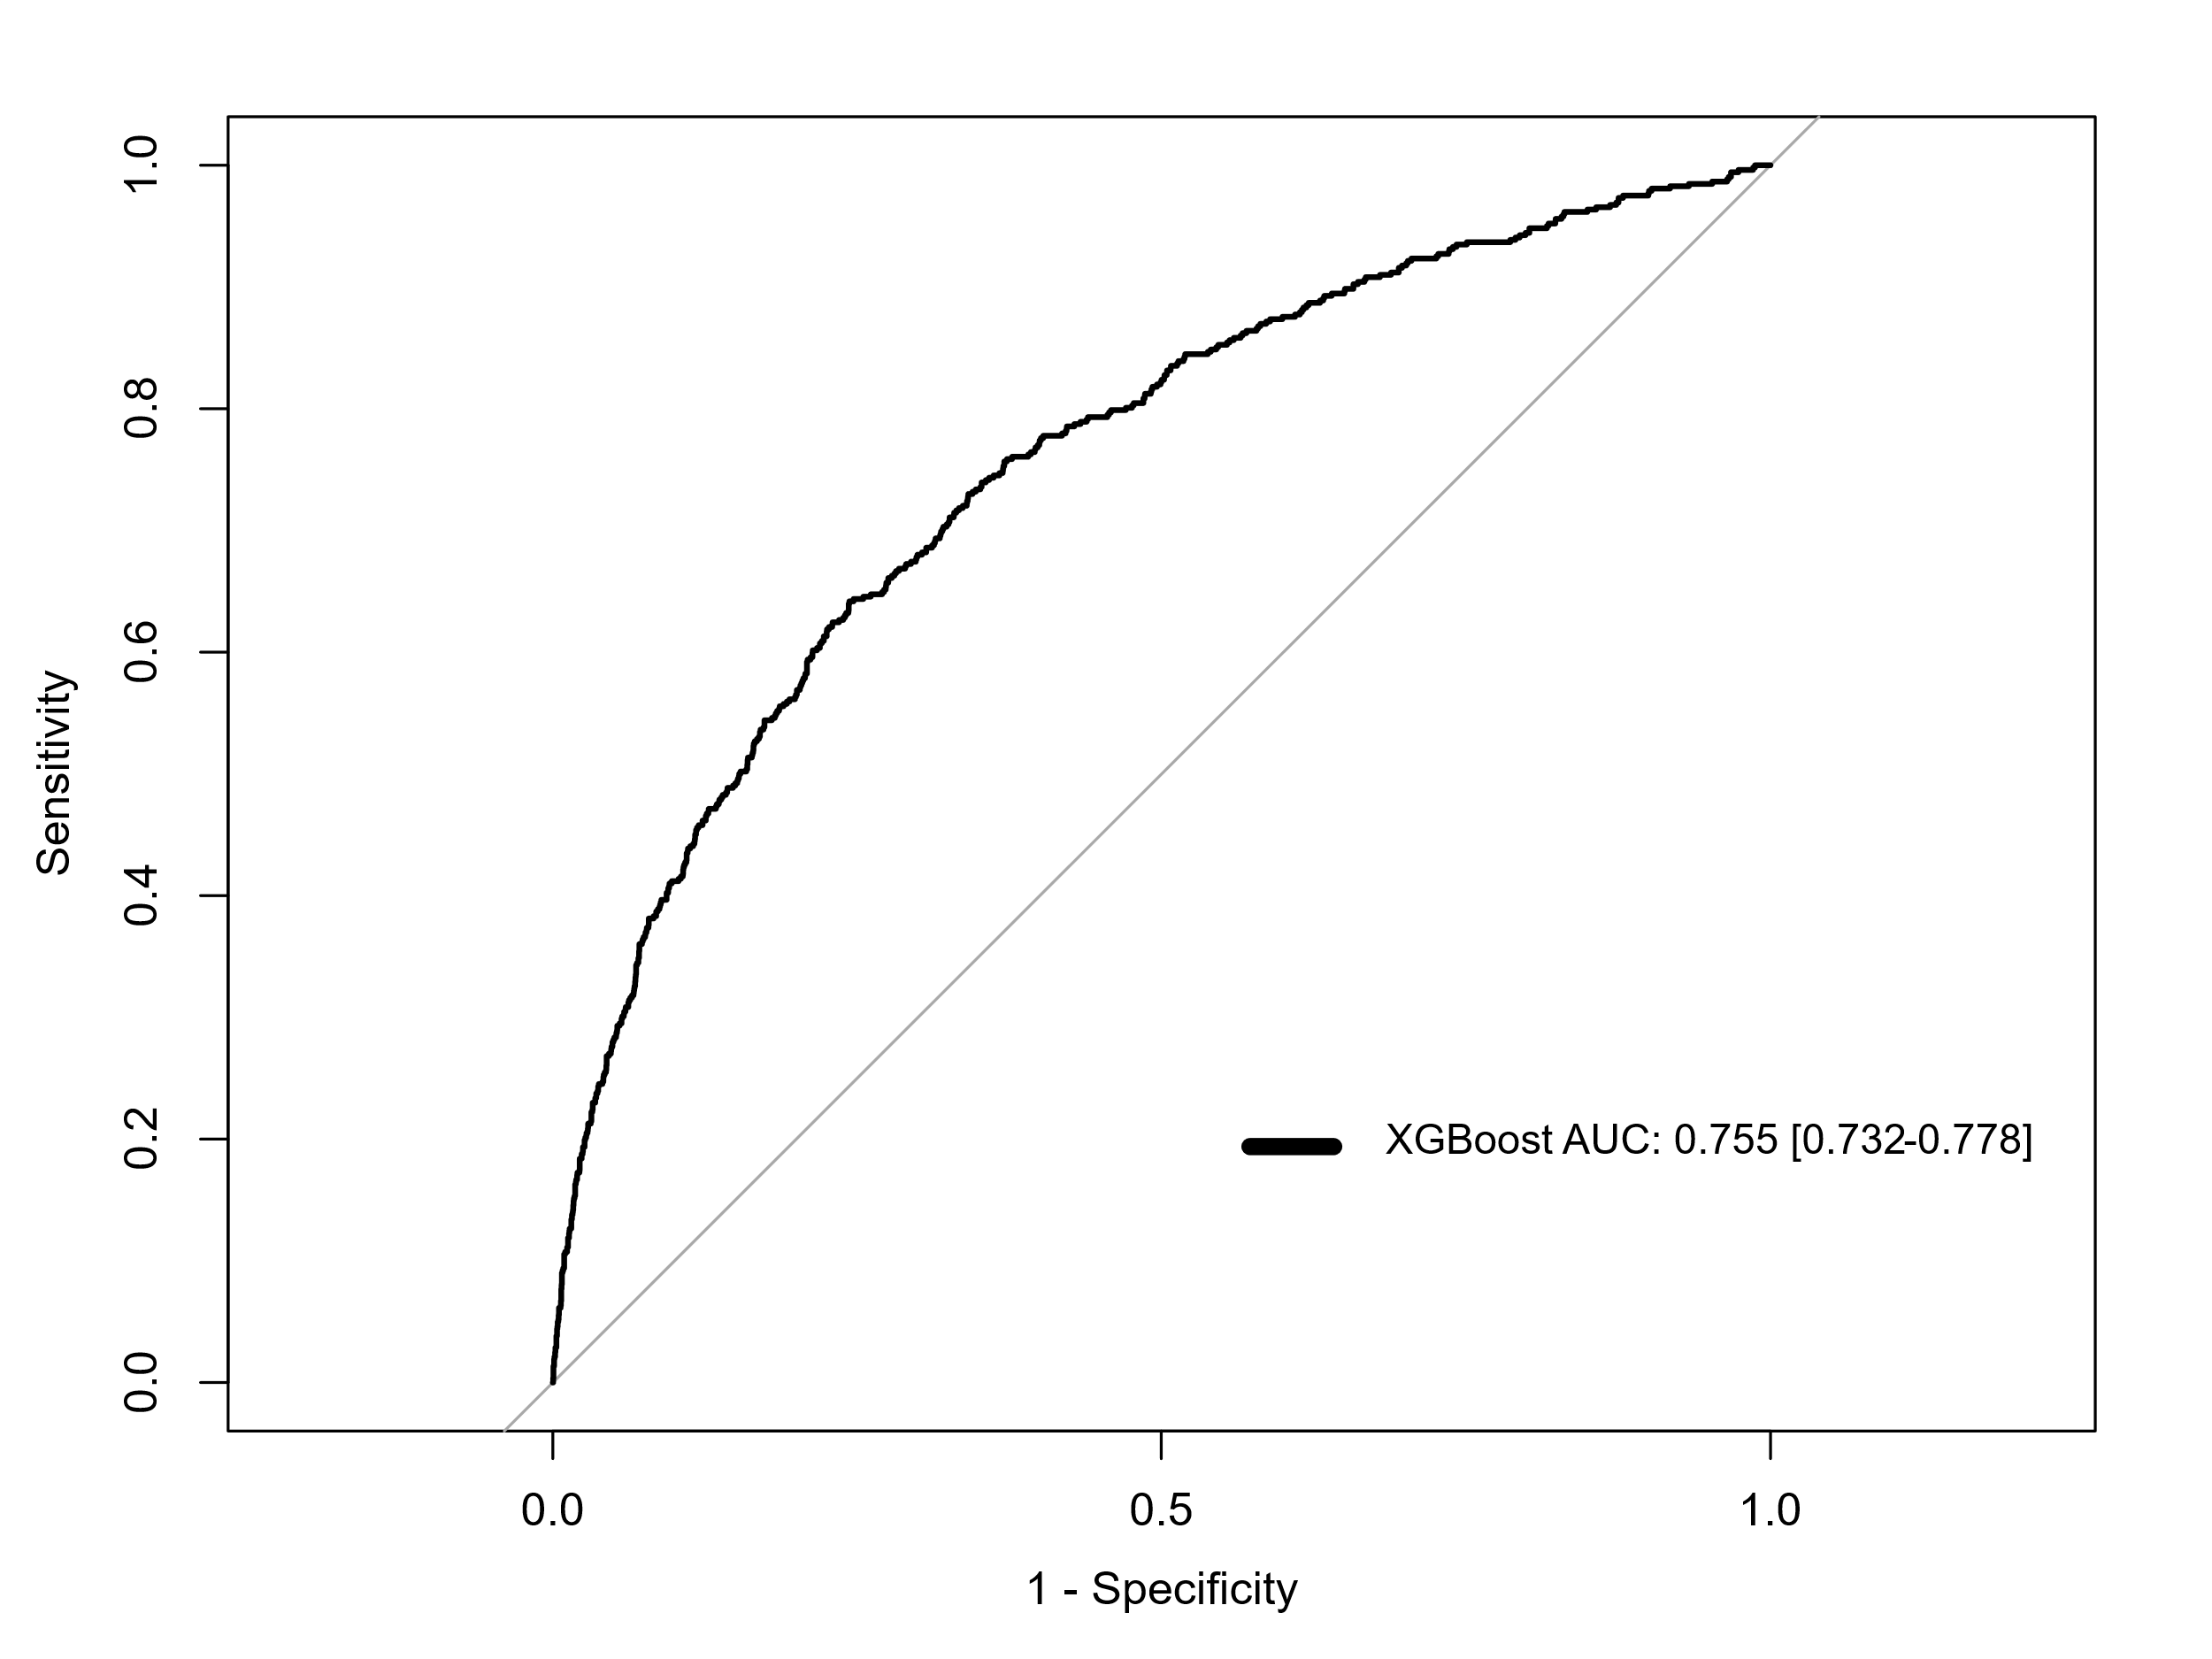


ROC curve of the XGBoost model on an external validation set.

ROC: receiver operating characteristic; AUC: area under the curve.

**Figure_S3** A stratified analysis of the association between SHR and all-cause mortality (A) and CVD mortality (B) among CMS respondents in the NHANES database.

**A**


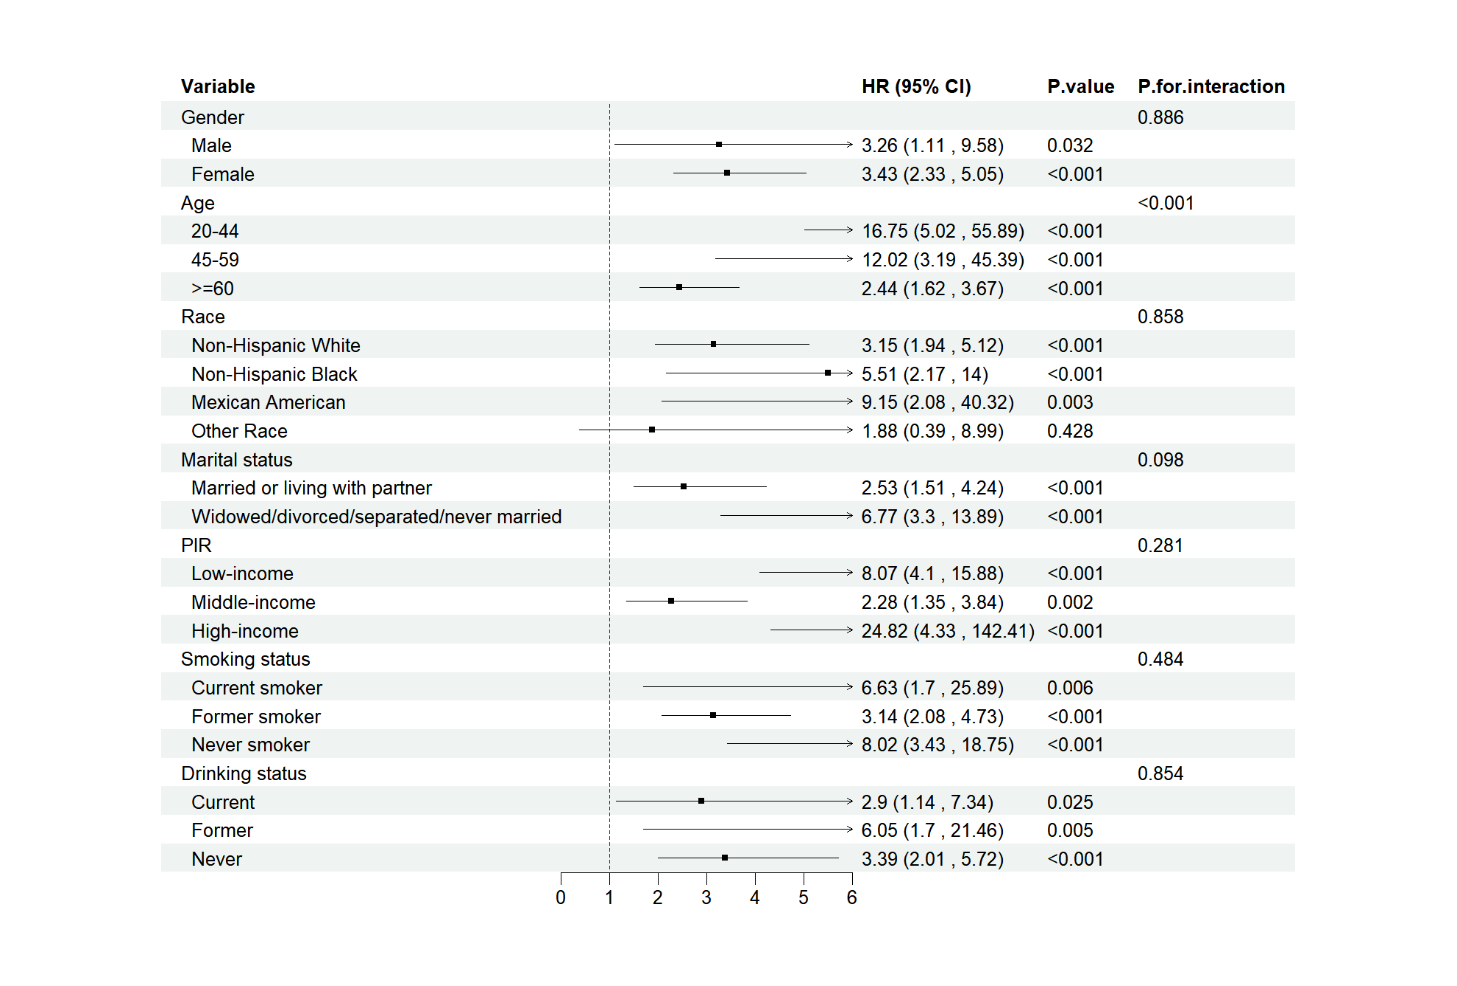


**B**


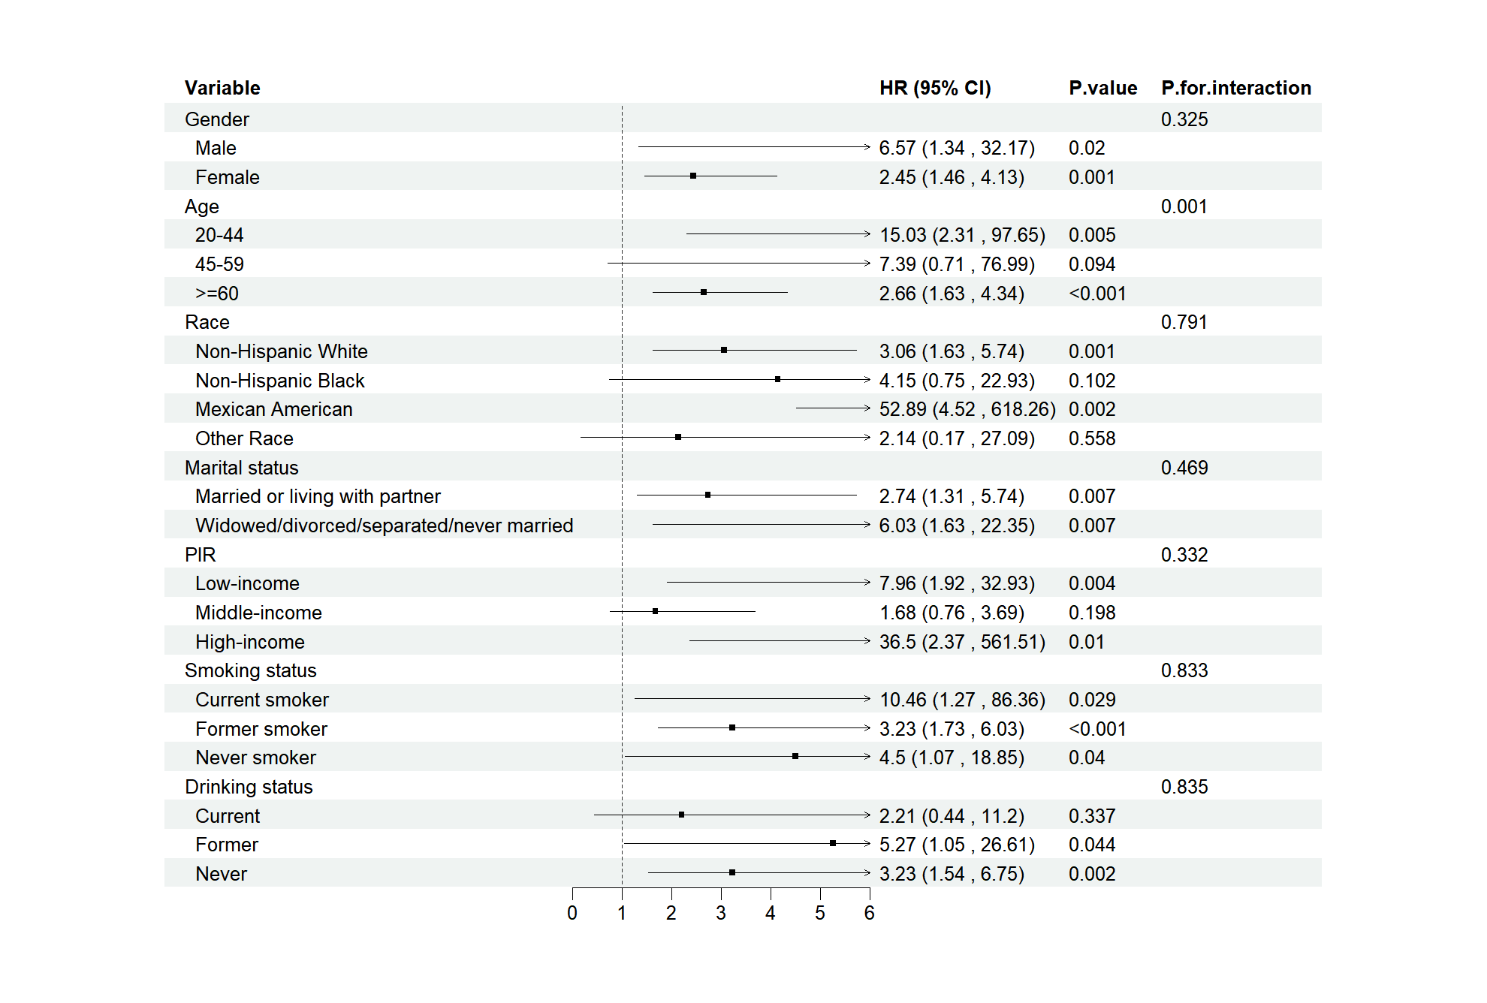


PIR: Ratio of family income to poverty; CVD: cardiovascular diseases; CMS: Cardiometabolic syndrome; HR: hazard ratio; 95% CI: 95% confidence interval.

**Figure_S4** A stratified analysis of the association between SHR and all-cause mortality among CMS respondents in the CHARLS database.


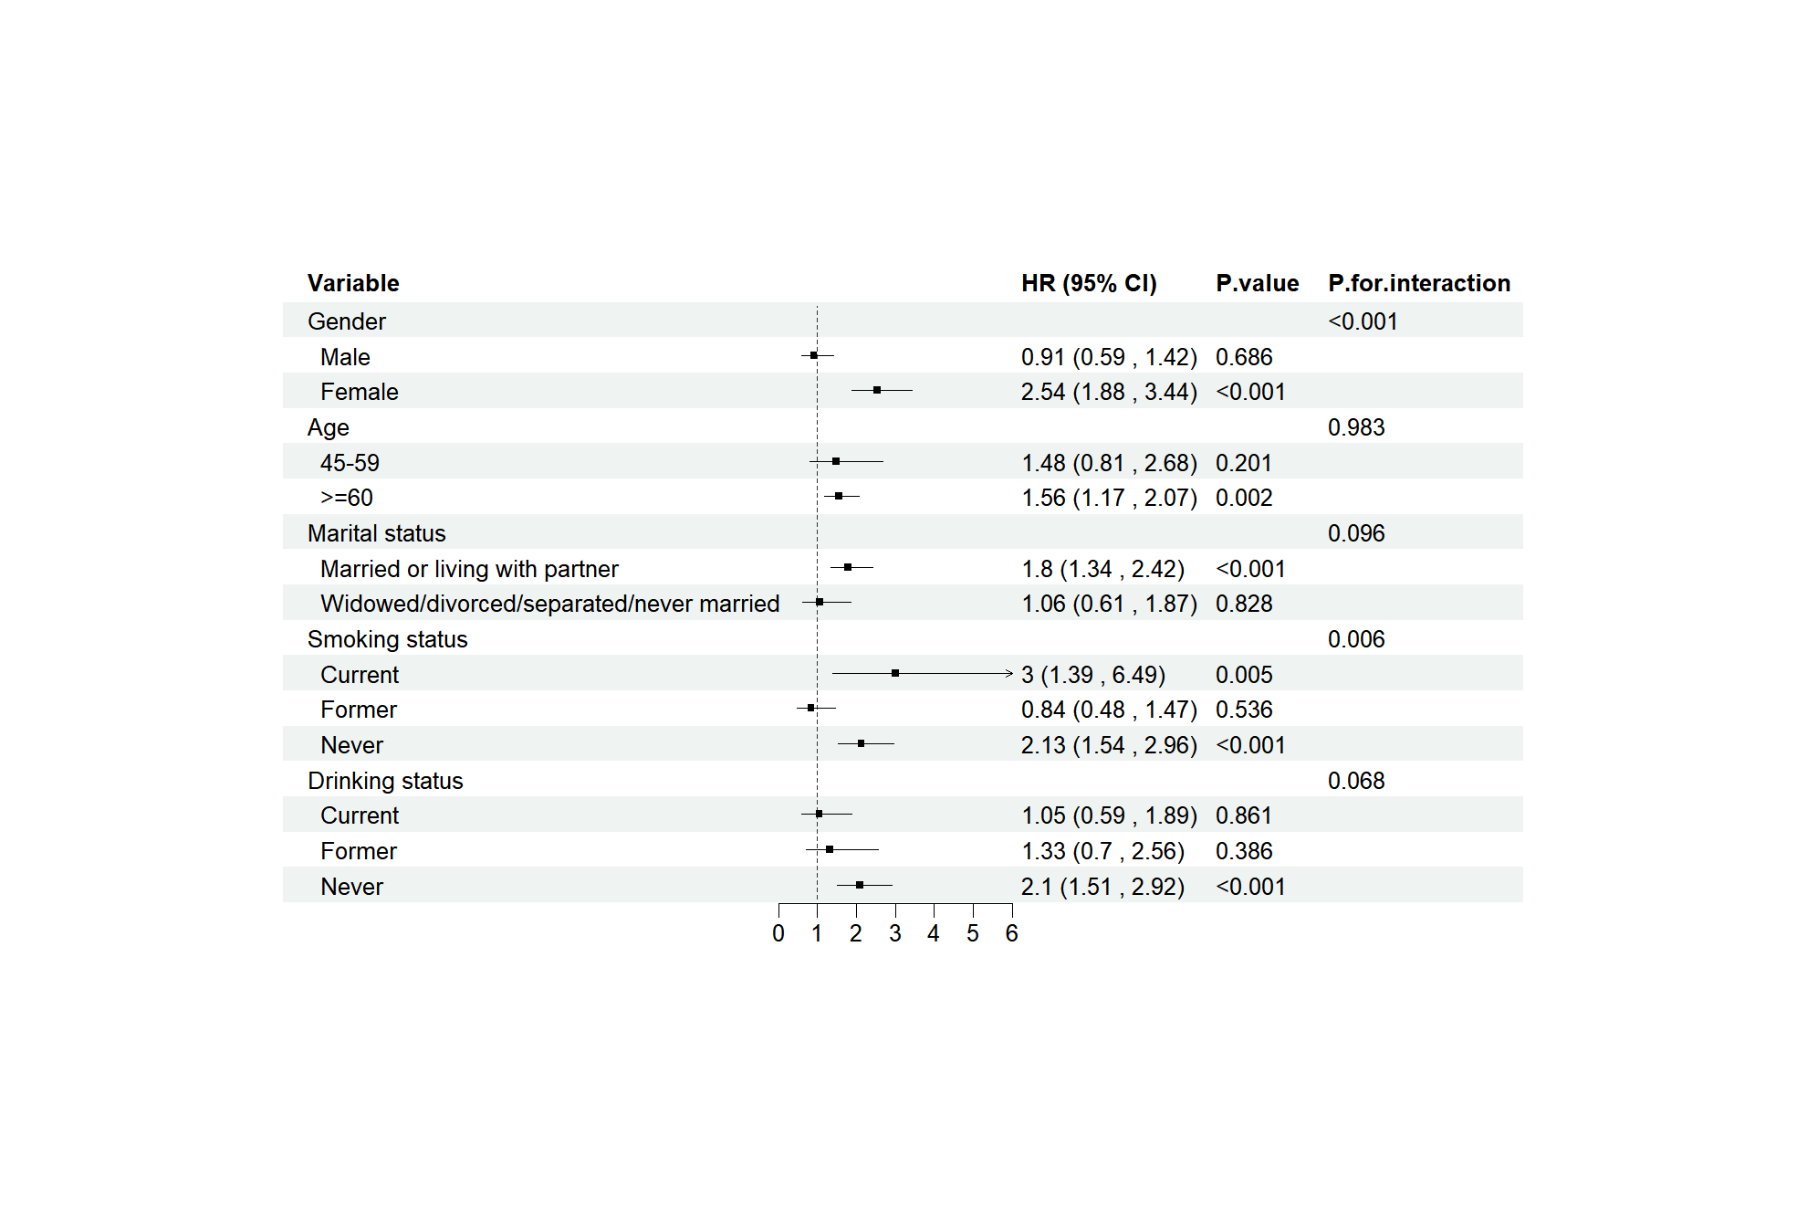


Ratio of family income to poverty; CMS: Cardiometabolic syndrome; HR: hazard ratio; 95% CI: 95% confidence interval.
